# Supplementary material for: A Large-Scale Candidate-Gene Association Mapping for Drought Tolerance and Agronomic Traits in Sugarcane
Source: MDPI journal article supplement (doi:10.3390/ijms241612801), 2023-08-15
Supplement: s1 [file s1]

**Table S1.** Details of 159 sugarcane accessions used in the present study

| ID    | Accession   | Country of origin  | Member possibility |           |           | Subpopulation |
|-------|-------------|--------------------|--------------------|-----------|-----------|---------------|
|       |             |                    | Cluster 1          | Cluster 2 | Cluster 3 |               |
| SU001 | MPT02-458   | Thai breeding line | 0                  | 0.03      | 0.97      | 3             |
| SU002 | F152        | Taiwan             | 0                  | 0.97      | 0.02      | 2             |
| SU003 | LF48-8077   | Fiji               | 1                  | 0         | 0         | 1             |
| SU004 | MPT04-169   | Thai breeding line | 0.12               | 0.07      | 0.81      | 3             |
| SU005 | MPT07-152   | Thai breeding line | 0.09               | 0.91      | 0         | 2             |
| SU006 | KKU99-06    | Thailand           | 0                  | 0         | 1         | 3             |
| SU007 | ROC7        | Taiwan             | 1                  | 0         | 0         | 1             |
| SU008 | MPT04-467   | Thai breeding line | 0.01               | 0.05      | 0.94      | 3             |
| SU009 | Q208        | Australia          | 1                  | 0         | 0         | 1             |
| SU010 | F148        | Taiwan             | 1                  | 0         | 0         | 1             |
| SU011 | Co290       | India              | 0.99               | 0.01      | 0         | 1             |
| SU012 | CP45-150    | USA                | 0                  | 1         | 0         | 2             |
| SU013 | M124/59     | Mauritius          | 0.99               | 0         | 0.01      | 1             |
| SU014 | Q100        | Australia          | 1                  | 0         | 0         | 1             |
| SU015 | K95-84      | Thailand           | 0                  | 1         | 0         | 2             |
| SU016 | B4744       | Barbados           | 1                  | 0         | 0         | 1             |
| SU017 | B76718      | Barbados           | 0.92               | 0.08      | 0         | 1             |
| SU018 | Co1287      | India              | 1                  | 0         | 0         | 1             |
| SU019 | UT1         | Thailand           | 0                  | 0         | 1         | 3             |
| SU020 | MPT06-26    | Thai breeding line | 0                  | 1         | 0         | 2             |
| SU021 | LF79-2964   | Fiji               | 1                  | 0         | 0         | 1             |
| SU022 | LK92-11     | Thailand           | 0                  | 1         | 0         | 2             |
| SU023 | MPT14-1-892 | Thai breeding line | 0                  | 1         | 0         | 2             |
| SU024 | MPT12-1782  | Thai breeding line | 0                  | 0         | 1         | 3             |
| SU025 | Biotec 3    | Thailand           | 0                  | 1         | 0         | 2             |
| SU026 | UT6         | Thailand           | 0.11               | 0.03      | 0.86      | 3             |
| SU027 | NCo310      | South Africa       | 0.97               | 0         | 0.03      | 1             |
| SU028 | Mossman     | Australia          | 0.96               | 0.03      | 0.01      | 1             |
| SU029 | B41721      | Barbados           | 0                  | 1         | 0         | 2             |
| SU030 | N50-211     | South Africa       | 0.99               | 0         | 0.01      | 1             |
| SU031 | IAC51-205   | Brazil             | 1                  | 0         | 0         | 1             |
| SU032 | BO24        | India              | 0                  | 1         | 0         | 2             |
| SU033 | MPT06-171   | Thai breeding line | 0.05               | 0         | 0.95      | 3             |
| SU034 | MPT14-1-504 | Thai breeding line | 0                  | 0.99      | 0.01      | 2             |
| SU035 | Pindar      | Australia          | 1                  | 0         | 0         | 1             |
| SU036 | MPT07-71    | Thai breeding line | 0                  | 0         | 1         | 3             |
| SU037 | MPT06-144   | Thai breeding line | 0.04               | 0.82      | 0.15      | 2             |
| SU038 | MPT14-5-239 | Thai breeding line | 0                  | 1         | 0         | 2             |
| SU039 | Fiji105     | Fiji               | 0.01               | 0.83      | 0.16      | 2             |
| SU040 | Galua       | Unknown            | 0.11               | 0.89      | 0         | 2             |
| SU041 | Kps01-25    | Thailand           | 0                  | 0.95      | 0.05      | 2             |
| SU042 | MPT09-296   | Thai breeding line | 0.25               | 0.05      | 0.7       | 3             |
| SU043 | KKU99-02    | Thailand           | 0                  | 0         | 1         | 3             |
| SU044 | ROC1        | Taiwan             | 0.93               | 0.06      | 0.01      | 1             |
| SU045 | F170        | Taiwan             | 0                  | 0         | 1         | 3             |
| SU046 | MPT14-6-63  | Thai breeding line | 0                  | 1         | 0         | 2             |
| SU047 | MPT06-367   | Thai breeding line | 0                  | 0.12      | 0.88      | 3             |
| SU048 | Co331       | India              | 0                  | 0         | 1         | 3             |
| SU049 | CP75-324    | USA                | 0                  | 0         | 1         | 3             |
| SU050 | M147/158    | Mauritius          | 0                  | 1         | 0         | 2             |
| SU051 | Q83         | Australia          | 1                  | 0         | 0         | 1             |
| SU052 | Yasawa      | Fiji               | 1                  | 0         | 0         | 1             |
| SU053 | MPT06-362   | Thai breeding line | 0.02               | 0.75      | 0.23      | 2             |
| SU054 | MPT14-1-180 | Thai breeding line | 0                  | 1         | 0         | 2             |
| SU055 | MPT04-303   | Thai breeding line | 0.11               | 0.78      | 0.11      | 2             |

| ID    | Accession   | Country of origin  | Member possibility |           |           | Subpopulation |
|-------|-------------|--------------------|--------------------|-----------|-----------|---------------|
|       |             |                    | Cluster 1          | Cluster 2 | Cluster 3 |               |
| SU056 | K99-72      | Thailand           | 0                  | 0         | 1         | 3             |
| SU057 | BL4         | Sri Lanka          | 0                  | 1         | 0         | 2             |
| SU058 | 3-2-023L    | Thailand           | 1                  | 0         | 0         | 1             |
| SU059 | MPT08-50    | Thai breeding line | 0.32               | 0.67      | 0.01      | 2             |
| SU060 | Q81         | Australia          | 1                  | 0         | 0         | 1             |
| SU061 | F153        | Taiwan             | 0                  | 1         | 0         | 2             |
| SU062 | CP72-120    | USA                | 0                  | 1         | 0         | 2             |
| SU063 | CN1         | Thailand           | 1                  | 0         | 0         | 1             |
| SU064 | SP80        | Thailand           | 0                  | 0         | 1         | 3             |
| SU065 | Kpk98-40    | Thailand           | 0.23               | 0.28      | 0.49      | Admixture     |
| SU066 | SP50        | Thailand           | 0.83               | 0.15      | 0.02      |               |
| SU067 | Kps01-12    | Thailand           | 0                  | 0.98      | 0.02      | 2             |
| SU068 | PSA63       | Philippines        | 1                  | 0         | 0         | 1             |
| SU069 | F174        | Taiwan             | 0                  | 0         | 1         | 3             |
| SU070 | Mackay      | Australia          | 1                  | 0         | 0         | 1             |
| SU071 | Q146        | Australia          | 0.16               | 0.83      | 0.01      | 2             |
| SU072 | F177        | Taiwan             | 0.01               | 0.98      | 0.01      | 2             |
| SU073 | MPT02-669   | Thai breeding line | 0.1                | 0.02      | 0.88      | 3             |
| SU074 | Yuan Jiang  | Unknown            | 1                  | 0         | 0         | 1             |
| SU075 | MY55-14     | Cuba               | 1                  | 0         | 0         | 1             |
| SU076 | M13/58      | Mauritius          | 1                  | 0         | 0         | 1             |
| SU077 | Q47         | Australia          | 1                  | 0         | 0         | 1             |
| SU078 | MPT05-187   | Thai breeding line | 0                  | 0         | 1         | 3             |
| SU079 | MP1         | Thai breeding line | 0.81               | 0.19      | 0         | 1             |
| SU080 | IRK67-1     | Unknown            | 0.82               | 0.01      | 0.17      | 1             |
| SU081 | F140        | Taiwan             | 1                  | 0         | 0         | 1             |
| SU082 | MPT99-1444  | Thai breeding line | 0                  | 0         | 1         | 3             |
| SU083 | K93-219     | Thailand           | 0                  | 0.02      | 0.98      | 3             |
| SU084 | KK3         | Thailand           | 0                  | 1         | 0         | 2             |
| SU085 | Q77         | Australia          | 1                  | 0         | 0         | 1             |
| SU086 | MPT06-169   | Thai breeding line | 0                  | 1         | 0         | 2             |
| SU087 | MPT09-204   | Thai breeding line | 0                  | 0.03      | 0.97      | 3             |
| SU088 | PR3067      | USA                | 0                  | 1         | 0         | 2             |
| SU089 | Eros        | Australia          | 1                  | 0         | 0         | 1             |
| SU090 | MPT04-55    | Thai breeding line | 0.01               | 0.01      | 0.98      | 3             |
| SU091 | Tuc74-6     | Argentina          | 0.96               | 0.02      | 0.03      | 1             |
| SU092 | BO14        | India              | 1                  | 0         | 0         | 1             |
| SU093 | MPT14-1-902 | Thai breeding line | 0                  | 1         | 0         | 2             |
| SU094 | LF76-2300   | Fiji               | 1                  | 0         | 0         | 1             |
| SU095 | UT5         | Thailand           | 0.08               | 0.43      | 0.5       | Admixture     |
| SU096 | MPT14-1-857 | Thai breeding line | 0                  | 1         | 0         |               |
| SU097 | DB7160      | Barbados           | 0                  | 1         | 0         | 2             |
| SU098 | LF78-960    | Fiji               | 0                  | 0.95      | 0.04      | 2             |
| SU099 | MP2         | Thai breeding line | 1                  | 0         | 0         | 1             |
| SU100 | R397        | Reunion            | 1                  | 0         | 0         | 1             |
| SU101 | Biotec 5    | Thailand           | 0                  | 1         | 0         | 2             |
| SU102 | MPT14-2-662 | Thai breeding line | 0.15               | 0.85      | 0         | 2             |
| SU103 | Phil66-07   | Philippines        | 0.8                | 0.19      | 0.02      | 1             |
| SU104 | CP63-306    | USA                | 0                  | 0         | 1         | 3             |
| SU105 | Mana        | Fiji               | 1                  | 0         | 0         | 1             |
| SU106 | GT29        | China              | 0.89               | 0.11      | 0         | 1             |
| SU107 | Biotec 2    | Thailand           | 0                  | 1         | 0         | 2             |
| SU108 | Biotec 1    | Thailand           | 0                  | 1         | 0         | 2             |
| SU109 | Q117        | Australia          | 1                  | 0         | 0         | 1             |
| SU110 | MPT07-1     | Thai breeding line | 0                  | 0         | 1         | 3             |
| SU111 | Tuc72-5     | Argentina          | 0.11               | 0.87      | 0.02      | 2             |
| SU112 | Kwt3        | China              | 0                  | 0.08      | 0.92      | 3             |

| ID    | Accession   | Country of origin  | Member possibility |           |           | Subpopulation |
|-------|-------------|--------------------|--------------------|-----------|-----------|---------------|
|       |             |                    | Cluster 1          | Cluster 2 | Cluster 3 |               |
| SU113 | K92-80      | Thailand           | 0                  | 1         | 0         | 2             |
| SU114 | MPT06-166   | Thai breeding line | 0.42               | 0.01      | 0.57      | Admixture     |
| SU115 | MPT08-191   | Thai breeding line | 0.16               | 0.32      | 0.52      | Admixture     |
| SU116 | Biotec 4    | Thailand           | 0                  | 1         | 0         | 2             |
| SU117 | Ebene1/37   | Mauritius          | 1                  | 0         | 0         | 1             |
| SU118 | UT8         | Thailand           | 0                  | 0.94      | 0.06      | 2             |
| SU119 | MPT02-665   | Thai breeding line | 0                  | 0.98      | 0.02      | 2             |
| SU120 | PL310       | Unknown            | 0                  | 1         | 0         | 2             |
| SU121 | MPT11-82    | Thai breeding line | 0                  | 0.24      | 0.76      | 3             |
| SU122 | MPT08-3     | Thai breeding line | 0.13               | 0.01      | 0.86      | 3             |
| SU123 | MPT12-141   | Thai breeding line | 0                  | 1         | 0         | 2             |
| SU124 | UT3         | Thailand           | 0                  | 0         | 1         | 3             |
| SU125 | MPT09-118   | Thai breeding line | 0                  | 0.78      | 0.22      | 2             |
| SU126 | CP76-340    | USA                | 0                  | 0         | 1         | 3             |
| SU127 | UT12        | Thailand           | 0                  | 0.31      | 0.68      | 3             |
| SU128 | MPT02-612   | Thai breeding line | 0                  | 0         | 1         | 3             |
| SU129 | MPT14-1-172 | Thai breeding line | 0                  | 1         | 0         | 2             |
| SU130 | MPT06-344   | Thai breeding line | 0                  | 0.98      | 0.02      | 2             |
| SU131 | MPT14-1-976 | Thai breeding line | 0                  | 0.99      | 0.01      | 2             |
| SU132 | Q115        | Australia          | 1                  | 0         | 0         | 1             |
| SU133 | MPT14-9-133 | Thai breeding line | 0.98               | 0         | 0.02      | 1             |
| SU134 | Co1148      | India              | 0.87               | 0.08      | 0.05      | 1             |
| SU135 | MPT10-54    | Thai breeding line | 0.11               | 0.89      | 0         | 2             |
| SU136 | MPT13-118   | Thai breeding line | 0                  | 0.7       | 0.3       | Admixture     |
| SU137 | MPT14-5-216 | Thai breeding line | 0                  | 1         | 0         | 2             |
| SU138 | NCo382      | South Africa       | 0.99               | 0         | 0         | 1             |
| SU139 | TBy20-2248  | Thailand           | 0                  | 1         | 0         | 2             |
| SU140 | CP61-39     | USA                | 0.06               | 0.93      | 0.02      | 2             |
| SU141 | MP3         | Thai breeding line | 0                  | 1         | 0         | 2             |
| SU142 | MPT14-1-468 | Thai breeding line | 0                  | 1         | 0         | 2             |
| SU143 | IAC49-131   | Brazil             | 1                  | 0         | 0         | 1             |
| SU144 | MPT11-181   | Thai breeding line | 0.01               | 0.25      | 0.74      | 3             |
| SU145 | ROC22       | Taiwan             | 0.97               | 0.02      | 0.01      | 1             |
| SU146 | K88-92      | Thailand           | 0                  | 0         | 1         | 3             |
| SU147 | KKU99-01    | Thailand           | 0                  | 1         | 0         | 2             |
| SU148 | CAC57-23    | Philippines        | 1                  | 0         | 0         | 1             |
| SU149 | CP75-330    | USA                | 0.97               | 0.03      | 0.01      | 1             |
| SU150 | CP110       | USA                | 0                  | 1         | 0         | 2             |
| SU151 | D158-41     | Guyana             | 1                  | 0         | 0         | 1             |
| SU152 | IAC52-156   | Brazil             | 1                  | 0         | 0         | 1             |
| SU153 | KKU99-03    | Thailand           | 0                  | 0         | 1         | 3             |
| SU154 | MPT14-1-546 | Thai breeding line | 0                  | 1         | 0         | 2             |
| SU155 | MPT03-166   | Thai breeding line | 0                  | 0         | 1         | 3             |
| SU156 | Biotec 6    | Thailand           | 0                  | 1         | 0         | 2             |
| SU157 | K84-200     | Thailand           | 0                  | 1         | 0         | 2             |
| SU158 | MPT04-204   | Thai breeding line | 0                  | 0         | 1         | 3             |
| SU159 | TBy26-1255  | Thailand           | 0                  | 1         | 0         | 2             |

**Table S2.** Membership function value of drought tolerance (MFVD) for each drought tolerance category and classification of sugarcane accessions in each category

| Drought tolerance                                             | Plant cane                                                                                                                                                                                                                                                                                                                                                                                                                                       | Ratoon Cane                                                                                                                                                                                                                                                                                                                                                  |
|---------------------------------------------------------------|--------------------------------------------------------------------------------------------------------------------------------------------------------------------------------------------------------------------------------------------------------------------------------------------------------------------------------------------------------------------------------------------------------------------------------------------------|--------------------------------------------------------------------------------------------------------------------------------------------------------------------------------------------------------------------------------------------------------------------------------------------------------------------------------------------------------------|
| Highly drought tolerant<br>(MFVD $\geq 7.0$ )                 | SU138                                                                                                                                                                                                                                                                                                                                                                                                                                            |                                                                                                                                                                                                                                                                                                                                                              |
| Drought tolerant<br>( $0.6 \leq \text{MFVD} < 0.7$ )          | SU025, SU108, SU156                                                                                                                                                                                                                                                                                                                                                                                                                              | SU005, SU036, SU055, SU121, SU126, SU144, SU154, SU158                                                                                                                                                                                                                                                                                                       |
| Moderate drought tolerant<br>( $0.4 \leq \text{MFVD} < 0.6$ ) | SU005, SU007, SU009, SU013, SU021, SU024, SU026, SU027, SU031, SU038, SU039, SU040, SU044, SU046, SU049, SU050, SU053, SU054, SU055, SU061, SU062, SU064, SU066, SU067, SU071, SU075, SU078, SU079, SU082, SU083, SU087, SU088, SU093, SU096, SU100, SU101, SU103, SU107, SU110, SU113, SU115, SU116, SU118, SU121, SU122, SU125, SU126, SU129, SU130, SU131, SU135, SU136, SU137, SU140, SU141, SU143, SU144, SU146, SU147, SU154, SU155, SU158 | SU002, SU006, SU007, SU009, SU025, SU031, SU034, SU037, SU039, SU040, SU042, SU053, SU056, SU059, SU061, SU064, SU072, SU077, SU078, SU087, SU088, SU090, SU092, SU093, SU094, SU096, SU108, SU110, SU114, SU115, SU116, SU128, SU135, SU136, SU138, SU140, SU155, SU156, SU157                                                                              |
| Highly drought susceptible<br>(MFVD $< 0.2$ )                 | SU002, SU014, SU015, SU016, SU028, SU032, SU043, SU068, SU074, SU080, SU117, SU142, SU152, SU153                                                                                                                                                                                                                                                                                                                                                 | SU003, SU010, SU011, SU012, SU014, SU015, SU016, SU017, SU021, SU028, SU032, SU033, SU041, SU043, SU046, SU048, SU051, SU052, SU054, SU057, SU058, SU060, SU062, SU067, SU068, SU071, SU074, SU075, SU080, SU081, SU082, SU083, SU084, SU086, SU089, SU091, SU100, SU102, SU104, SU105, SU109, SU117, SU127, SU132, SU133, SU139, SU150, SU151, SU152, SU153 |

**Table S3.** Groups of candidate genes selected for SNP/InDel discovery

| Group                    | Function                  | Number of genes | Reference  |
|--------------------------|---------------------------|-----------------|------------|
| Physiological adaptation | Water and ion movement    | 117             | [78-80]    |
| Molecular adaptation     | Chaperone functions       |                 |            |
|                          | Osmotic homeostasis       |                 |            |
|                          | Detoxification            |                 |            |
|                          | Protection factor         |                 |            |
|                          | Channels and transporters |                 |            |
|                          | Regulatory proteins       |                 |            |
|                          | Signal transduction       |                 |            |
| Phytohormone metabolism  | Auxin metabolism          | 183             | [81]       |
|                          | ABA metabolism            |                 |            |
|                          | Ethylene metabolism       |                 |            |
| Drought inducible genes  | Gene expression data      | 349             | [11,82,83] |

**Table S4.** Statistical summary of SNPs/InDels markers in 649 targeted genes

| Chromosome | Genes | Probes | Coverage<br>(bp) | Raw variants |        | Biallelic variants |        | Remove<br>missing<br>data (10%) | Remove rare<br>variants<br>(MAF < 5%) | Remove<br>variants<br>with LD | Markers for<br>association study |       | Marker /<br>gene |
|------------|-------|--------|------------------|--------------|--------|--------------------|--------|---------------------------------|---------------------------------------|-------------------------------|----------------------------------|-------|------------------|
|            |       |        |                  | SNP          | InDel  | SNP                | InDel  |                                 |                                       |                               | SNP                              | InDel |                  |
| 1          | 133   | 2,617  | 255,210          | 34,477       | 8,096  | 33,455             | 7,150  | 30,893                          | 5,901                                 | 2,030                         | 1,863                            | 167   | 15.26            |
| 2          | 79    | 1,587  | 155,070          | 22,817       | 4,992  | 22,122             | 4,330  | 20,126                          | 4,048                                 | 1,386                         | 1,282                            | 104   | 17.54            |
| 3          | 99    | 1,913  | 188,460          | 26,256       | 6,145  | 25,496             | 5,435  | 23,882                          | 4,068                                 | 1,574                         | 1,425                            | 149   | 15.90            |
| 4          | 74    | 1,304  | 128,130          | 19,832       | 4,585  | 19,151             | 4,044  | 18,274                          | 3,182                                 | 1,180                         | 1,085                            | 95    | 15.95            |
| 5          | 18    | 375    | 37,320           | 7,431        | 1,836  | 7,069              | 1,602  | 6,602                           | 1,387                                 | 471                           | 441                              | 30    | 26.17            |
| 6          | 65    | 1,003  | 98,670           | 16,732       | 3,786  | 16,215             | 3,342  | 14,157                          | 2,705                                 | 1,003                         | 929                              | 74    | 15.43            |
| 7          | 43    | 755    | 73,830           | 13,058       | 2,911  | 12,607             | 2,574  | 11,884                          | 2,333                                 | 915                           | 876                              | 39    | 21.28            |
| 8          | 21    | 385    | 37,980           | 7,221        | 1,408  | 6,966              | 1,236  | 5,915                           | 1,143                                 | 405                           | 380                              | 25    | 19.29            |
| 9          | 57    | 963    | 94,260           | 15,952       | 3,581  | 15,349             | 3,173  | 14,297                          | 2,885                                 | 1,254                         | 1,189                            | 65    | 22.00            |
| 10         | 60    | 1,411  | 138,000          | 23,268       | 5,494  | 22,333             | 4,817  | 22,278                          | 4,112                                 | 1,515                         | 1,351                            | 164   | 25.25            |
| All        | 649   | 12,313 | 1,206,930        | 187,044      | 42,834 | 180,763            | 37,703 | 168,308                         | 31,764                                | 11,733                        | 10,821                           | 912   | 18.19            |

**Table S5.** SNPs/InDels markers significantly associated with yield-related traits, sugar-related traits, and drought tolerance indices under non-stressed (NS) and water-stressed (WS) conditions in plant cane (P) and ratoon cane (R). Significant marker-trait association based on Bonferroni correction with  $\alpha=0.05$  (p value  $\leq 4.26 \times 10^{-6}$ ), CL = cane length, CD = cane diameter, IL = internode length, SCW = single cane weight, NMC = number of millable canes, CY = cane yield, CCS = commercial cane sugar, FB = fiber, BR = brix, PO = polarization, PU = purity, SY = sugar yield, RA = ratooning ability; DC = Drought-tolerant coefficient of each yield traits; MFVD = the average value of the membership function of all the traits

| Trait                                         | Marker     | Condition<br>(season) | Chromosome<br>/ Position | p-value  | PVE (%) | Gene         | Description                                     |
|-----------------------------------------------|------------|-----------------------|--------------------------|----------|---------|--------------|-------------------------------------------------|
| <i>Physiological and molecular adaptation</i> |            |                       |                          |          |         |              |                                                 |
| CL                                            | SNP11382   | NS (P)                | 3 / 6707337              | 2.97E-06 | 12.90   | Sh03_g003750 | Putative prolyl 4-hydroxylase 7                 |
|                                               | SNP13827   | NS (P)                | 3 / 43166999             | 3.42E-06 | 12.75   | Sh03_g025700 | Heat shock cognate 70 kDa protein               |
|                                               | SNP06991   | NS (R)                | 2 / 7100211              | 6.16E-09 | 16.72   | Sh02_g004300 | Similar to Os07g0194500 protein                 |
| CD                                            | SNP14174   | NS (P)                | 3 / 47197032             | 4.22E-07 | 10.57   | Sh03_g028350 | Lipoxygenase                                    |
|                                               | SNP23365   | NS (R)                | 7 / 6153731              | 1.76E-11 | 21.43   | Sh07_g004490 | Protein LSD1                                    |
|                                               | SNP27023   | WS (P)                | 9 / 4502081              | 2.03E-07 | 12.67   | Sh09_g002860 | Sugar transporter ERD6-like 14                  |
|                                               | SNP30896   | WS (P)                | 10 / 10317485            | 1.77E-10 | 19.98   | Sh10_g006580 | Pectinesterase                                  |
|                                               | SNP26624   | WS (R)                | 8 / 24228458             | 2.68E-06 | 9.96    | Sh08_g013050 | Sodium/hydrogen exchanger 7                     |
|                                               | SNP30132   | WS (R)                | 10 / 2948611             | 1.12E-07 | 12.54   | Sh10_g001870 | Pathogenesis-related protein PRMS               |
|                                               | SNP27647   | NS (R)                | 9 / 7169040              | 4.30E-07 | 11.53   | Sh09_g004400 | Similar to Os05g0155200 protein                 |
| SCW                                           | SNP26148   | WS (P)                | 8 / 16789699             | 3.24E-06 | 12.84   | Sh08_g008700 | Heat shock cognate 70 kDa protein 2             |
|                                               | InDel02945 | NS (R)                | 9 / 25713932             | 8.23E-06 | 11.82   | Sh09_g013120 | Nuclear transcription factor Y subunit B        |
| SY                                            | SNP12296   | WS (P)                | 3 / 18382076             | 3.31E-08 | 13.72   | Sh03_g010910 | Neutral/alkaline invertase 1, mitochondrial     |
| CCS                                           | SNP06940   | NS (P)                | 2 / 7066535              | 2.22E-07 | 12.47   | Sh02_g004260 | Prolyl 4-hydroxylase 2                          |
|                                               | SNP26779   | WS (R)                | 9 / 3288413              | 4.35E-07 | 12.04   | Sh09_g001950 | Similar to Os05g0120200 protein                 |
| PO                                            | SNP19459   | NS (P)                | 5 / 22469127             | 1.17E-07 | 12.95   | Sh05_g011820 | Linoleate 9S-lipoxygenase 2                     |
|                                               | SNP04788   | NS (R)                | 1 / 52186011             | 5.57E-09 | 16.32   | Sh01_g031140 | Hexosyltransferase                              |
|                                               | InDel01376 | NS (R)                | 3 / 34660924             | 6.36E-07 | 11.28   | Sh03_g019550 | Transcription factor RAX3                       |
|                                               | SNP26801   | WS (P)                | 9 / 3288740              | 3.14E-06 | 10.18   | Sh09_g001950 | Similar to Os05g0120200 protein                 |
| PU                                            | SNP06940   | NS (P)                | 2 / 7066535              | 8.95E-07 | 10.59   | Sh02_g004260 | Prolyl 4-hydroxylase 2                          |
|                                               | InDel01332 | WS (P)                | 3 / 30050757             | 1.16E-07 | 12.34   | Sh03_g016850 | Similar to ABRE-binding factor BZ-1             |
| FB                                            | SNP22244   | NS (P)                | 6 / 28323255             | 5.37E-09 | 15.55   | Sh06_g016150 | Chloroplast lipocalin                           |
|                                               | SNP02972   | NS (R)                | 1 / 39909160             | 1.52E-06 | 13.66   | Sh01_g023060 | Similar to Proline dehydrogenase family protein |
|                                               | SNP24360   | WS (P)                | 7 / 19145418             | 1.30E-06 | 10.32   | Sh07_g010850 | Similar to Os08g0451800 protein                 |
| DC <sub>IL</sub>                              | SNP16318   | Index (P)             | 4 / 26592249             | 1.03E-07 | 12.48   | Sh04_g015090 | Transcription factor MYB62                      |
| DC <sub>SCW</sub>                             | SNP08202   | Index (P)             | 2 / 27902871             | 1.54E-07 | 12.94   | Sh02_g014580 | BZIP transcription factor                       |
|                                               | SNP01278   | Index (R)             | 1 / 11528786             | 2.06E-09 | 17.79   | Sh01_g008050 | Acc synthase                                    |
|                                               | SNP10036   | Index (R)             | 2 / 44603116             | 1.15E-08 | 15.66   | Sh02_g025960 | Polyol transporter 5                            |
| DC <sub>CY</sub>                              | SNP01310   | Index (P)             | 1 / 11529997             | 3.85E-08 | 13.98   | Sh01_g008050 | Acc synthase                                    |
|                                               | SNP16972   | Index (P)             | 4 / 37082704             | 1.16E-06 | 11.05   | Sh04_g021630 | Trehalose 6-phosphate phosphatase               |
|                                               | SNP32955   | Index (R)             | 10 / 27726604            | 1.96E-08 | 14.46   | Sh10_g014930 | Gl1 protein                                     |

| Trait                                         | Marker     | Condition<br>(season) | Chromosome<br>/ Position | P value  | PVE (%) | Gene         | Description                                           |
|-----------------------------------------------|------------|-----------------------|--------------------------|----------|---------|--------------|-------------------------------------------------------|
| <i>Physiological and molecular adaptation</i> |            |                       |                          |          |         |              |                                                       |
| DC <sub>sv</sub>                              | SNP01310   | Index (P)             | 1 / 11529997             | 4.99E-09 | 16.39   | Sh01_g008050 | Acc synthase                                          |
|                                               | InDel00906 | Index (P)             | 2 / 31511091             | 9.57E-08 | 13.47   | Sh02_g016830 | Similar to Os09g0499000 protein                       |
|                                               | SNP14149   | Index (P)             | 3 / 47196416             | 3.12E-06 | 9.85    | Sh03_g028350 | Lipoxygenase                                          |
| <i>Phytohormone metabolism</i>                |            |                       |                          |          |         |              |                                                       |
| CL                                            | SNP21180   | NS (R)                | 6 / 15936064             | 7.76E-09 | 15.85   | Sh06_g008570 | Cytochrome b561 and DOMON domain-containing protein   |
|                                               | SNP30086   | NS (R)                | 10 / 1993219             | 6.17E-08 | 13.99   | Sh10_g001250 | UDP-glucose: 2-hydroxyflavanone C-glucosyltransferase |
|                                               | SNP05708   | WS (R)                | 1 / 63992266             | 2.25E-06 | 9.24    | Sh01_g038920 | Os03g0194350 protein                                  |
|                                               | SNP21283   | WS (R)                | 6 / 16722810             | 7.00E-08 | 12.20   | Sh06_g009100 | Similar to OSIGBa0145C12.1 protein                    |
| CD                                            | SNP25333   | WS (R)                | 7 / 27924992             | 4.28E-07 | 11.44   | Sh07_g016790 | Ethylene insensitive 3-like 3 protein                 |
|                                               | SNP15778   | NS (R)                | 4 / 9688810              | 4.94E-08 | 12.74   | Sh04_g006500 | EIN3-binding F-box protein 1                          |
|                                               | SNP02074   | WS (P)                | 1 / 18852079             | 2.55E-07 | 12.15   | Sh01_g012390 | 9-cis-epoxycarotenoid dioxygenase 1, chloroplastic    |
|                                               | SNP28798   | WS (P)                | 9 / 20675137             | 2.41E-07 | 11.82   | Sh09_g010250 | Glycosyltransferase                                   |
| IL                                            | SNP29315   | WS (P)                | 9 / 30148431             | 4.13E-06 | 8.92    | Sh09_g016200 | Protein continuous vascular ring 1                    |
|                                               | SNP11371   | NS (R)                | 3 / 6123382              | 1.71E-07 | 13.04   | Sh03_g003440 | Transaminase/ transferase isoform 1                   |
| SCW                                           | SNP28798   | NS (P)                | 9 / 20675137             | 8.81E-08 | 13.41   | Sh09_g010250 | Glycosyltransferase                                   |
|                                               | SNP31040   | NS (R)                | 10 / 12574379            | 8.07E-08 | 13.76   | Sh10_g007750 | Similar to plant protein family protein, expressed    |
|                                               | SNP28798   | WS (P)                | 9 / 20675137             | 1.60E-06 | 13.59   | Sh09_g010250 | Glycosyltransferase                                   |
|                                               | SNP28760   | NS (P)                | 9 / 20674823             | 2.17E-09 | 17.51   | Sh09_g010250 | Glycosyltransferase                                   |
| NMC                                           | SNP05000   | NS (R)                | 1 / 54088475             | 3.57E-08 | 12.98   | Sh01_g032260 | Abscisic acid receptor PYL5                           |
|                                               | SNP28810   | NS (R)                | 9 / 23085243             | 1.22E-06 | 9.75    | Sh09_g011670 | Serine/threonine-protein kinase SAPK4                 |
|                                               | SNP17032   | WS (P)                | 4 / 38314918             | 3.57E-06 | 12.82   | Sh04_g022390 | Auxin-responsive protein SAUR32                       |
|                                               | SNP00918   | NS (P)                | 1 / 5872959              | 3.69E-06 | 12.67   | Sh01_g004020 | Indole-3-acetaldehyde oxidase                         |
| CY                                            | SNP02074   | NS (P)                | 1 / 18852079             | 3.88E-06 | 12.62   | Sh01_g012390 | 9-cis-epoxycarotenoid dioxygenase 1, chloroplastic    |
|                                               | SNP20355   | NS (P)                | 6 / 6883524              | 9.92E-07 | 9.96    | Sh06_g003010 | Ethylene-responsive transcription factor ERF113       |
|                                               | SNP20008   | NS (R)                | 6 / 4990510              | 1.26E-06 | 10.64   | Sh06_g002150 | Momilactone A synthase                                |
|                                               | SNP11186   | WS (P)                | 3 / 5339732              | 3.10E-06 | 9.22    | Sh03_g002910 | 1-aminocyclopropane-1-carboxylate oxidase             |
| BR                                            | SNP17009   | WS (P)                | 4 / 38313956             | 7.59E-10 | 18.56   | Sh04_g022390 | Auxin-responsive protein SAUR32                       |
|                                               | SNP28774   | NS (R)                | 9 / 20674923             | 1.44E-06 | 10.68   | Sh09_g010250 | Glycosyltransferase                                   |
| CCS                                           | SNP17531   | NS (P)                | 4 / 39831899             | 5.41E-08 | 12.77   | Sh04_g023500 | Indole-3-acetic acid-induced protein ARG7             |
|                                               | SNP20342   | NS (R)                | 6 / 6883094              | 2.09E-06 | 10.00   | Sh06_g003010 | Ethylene-responsive transcription factor ERF113       |
|                                               | InDel02259 | NS (R)                | 6 / 22581038             | 2.59E-06 | 9.31    | Sh06_g012530 | Auxin-independent growth promoter                     |
|                                               | SNP28774   | NS (R)                | 9 / 20674923             | 3.67E-07 | 11.96   | Sh09_g010250 | Glycosyltransferase                                   |
| PO                                            | SNP23693   | WS (P)                | 7 / 14061956             | 2.92E-07 | 12.21   | Sh07_g008590 | Putative protein                                      |
|                                               | SNP03745   | WS (R)                | 1 / 43409921             | 3.60E-06 | 9.48    | Sh01_g025450 | GH31                                                  |
|                                               | SNP10730   | WS (R)                | 3 / 1588896              | 4.59E-08 | 13.97   | Sh03_g000970 | Similar to Ethylene insensitive 2                     |
|                                               | SNP12207   | NS (P)                | 3 / 17592105             | 2.01E-06 | 9.75    | Sh03_g010510 | Ethylene-responsive transcription factor RAP2-3       |



| Trait                          | Marker     | Condition<br>(season) | Chromosome /<br>Position | P value  | PVE (%) | Gene         | Description                                                   |
|--------------------------------|------------|-----------------------|--------------------------|----------|---------|--------------|---------------------------------------------------------------|
| <i>Phytohormone metabolism</i> |            |                       |                          |          |         |              |                                                               |
| PO                             | SNP17531   | NS (P)                | 4 / 39831899             | 2.26E-06 | 9.94    | Sh04_g023500 | Indole-3-acetic acid-induced protein ARG7                     |
|                                | SNP23693   | NS (R)                | 7 / 14061956             | 1.28E-06 | 10.47   | Sh07_g008590 | Putative protein                                              |
|                                | SNP00861   | WS (P)                | 1 / 5871494              | 1.51E-06 | 10.05   | Sh01_g004020 | Indole-3-acetaldehyde oxidase                                 |
|                                | SNP13002   | WS (R)                | 3 / 35125167             | 2.05E-06 | 10.68   | Sh03_g020000 | GDSL esterase/lipase                                          |
| PU                             | SNP00861   | NS (P)                | 1 / 5871494              | 2.88E-06 | 10.06   | Sh01_g004020 | Indole-3-acetaldehyde oxidase                                 |
|                                | SNP17393   | NS (R)                | 4 / 38881710             | 3.60E-06 | 9.60    | Sh04_g022760 | Similar to Chromosome chr18 scaffold_1                        |
|                                | SNP19425   | NS (R)                | 5 / 17948281             | 1.25E-06 | 10.45   | Sh05_g009110 | HVA22-like protein                                            |
|                                | SNP21656   | NS (R)                | 6 / 21293971             | 8.56E-09 | 14.48   | Sh06_g011620 | EREBP-4 like protein                                          |
| FB                             | SNP23693   | NS (R)                | 7 / 14061956             | 1.08E-11 | 20.69   | Sh07_g008590 | Putative protein                                              |
|                                | InDel02232 | WS (P)                | 6 / 21259097             | 1.40E-06 | 10.53   | Sh06_g011580 | Ethylene-responsive transcription factor 5                    |
|                                | SNP16699   | NS (P)                | 4 / 33551613             | 2.60E-06 | 10.09   | Sh04_g019510 | Pollen-specific leucine-rich repeat extensin-like protein 4   |
|                                | SNP32494   | NS (P)                | 10 / 22150546            | 1.55E-06 | 10.66   | Sh10_g011820 | EREBP-4 like protein                                          |
|                                | SNP19005   | WS (P)                | 5 / 10175848             | 1.64E-08 | 15.51   | Sh05_g005730 | Flavin-containing monooxygenase                               |
|                                | SNP32494   | WS (P)                | 10 / 22150546            | 1.29E-11 | 22.38   | Sh10_g011820 | EREBP-4 like protein                                          |
| DC <sub>SCW</sub>              | SNP02600   | Index (R)             | 1 / 31339306             | 1.51E-07 | 13.25   | Sh01_g019210 | Perakine reductase                                            |
|                                | SNP05708   | Index (R)             | 1 / 63992266             | 1.06E-06 | 11.13   | Sh01_g038920 | Os03g0194350 protein                                          |
| DC <sub>CY</sub>               | InDel03451 | Index (P)             | 10 / 28410796            | 1.45E-09 | 17.59   | Sh10_g015190 | Auxin efflux carrier component                                |
|                                | SNP00861   | Index (R)             | 1 / 5871494              | 1.32E-11 | 22.51   | Sh01_g004020 | Indole-3-acetaldehyde oxidase                                 |
| DC <sub>SY</sub>               | SNP19400   | Index (R)             | 5 / 17947231             | 1.14E-07 | 10.88   | Sh05_g009110 | HVA22-like protein                                            |
|                                | SNP15547   | Index (P)             | 4 / 5566534              | 1.27E-06 | 11.46   | Sh04_g003750 | Cullin-associated NEDD8-dissociated protein 1                 |
|                                | SNP17009   | Index (P)             | 4 / 38313956             | 1.66E-06 | 10.35   | Sh04_g022390 | Auxin-responsive protein SAUR32                               |
|                                | SNP17032   | Index (P)             | 4 / 38314918             | 3.94E-08 | 14.79   | Sh04_g022390 | Auxin-responsive protein SAUR32                               |
|                                | SNP28780   | Index (P)             | 9 / 20674967             | 6.95E-09 | 14.77   | Sh09_g010250 | Glycosyltransferase                                           |
| MFVD                           | SNP14932   | Index (R)             | 3 / 54184437             | 2.53E-11 | 22.46   | Sh03_g033410 | Putative protein                                              |
|                                | SNP17032   | Index (P)             | 4 / 38314918             | 3.11E-06 | 9.66    | Sh04_g022390 | Auxin-responsive protein SAUR32                               |
|                                | SNP16162   | Index (R)             | 4 / 21724210             | 1.02E-06 | 10.26   | Sh04_g012100 | Ethylene-responsive transcription factor ERF021               |
|                                | SNP21960   | Index (R)             | 6 / 22584823             | 2.15E-09 | 15.74   | Sh06_g012530 | Auxin-independent growth promoter                             |
| <i>Drought inducible genes</i> |            |                       |                          |          |         |              |                                                               |
| CL                             | SNP24870   | NS (P)                | 7 / 23832165             | 4.25E-06 | 12.52   | Sh07_g013900 | ARO1-like protein 1                                           |
|                                | SNP03332   | NS (R)                | 1 / 41297435             | 1.08E-06 | 10.72   | Sh01_g023980 | Peroxidase                                                    |
|                                | SNP15892   | NS (R)                | 4 / 15583047             | 1.41E-07 | 12.30   | Sh04_g009360 | Peroxisomal fatty acid beta-oxidation multifunctional protein |
|                                | SNP15637   | WS (R)                | 4 / 5794042              | 1.38E-07 | 12.31   | Sh04_g003900 | Phosphoglycerate kinase, cytosolic                            |
|                                | SNP18377   | WS (R)                | 5 / 1856393              | 2.05E-06 | 10.31   | Sh05_g001300 | Protein Zinc induced facilitator-like 1                       |
| CD                             | SNP05953   | NS (P)                | 1 / 66130495             | 8.25E-08 | 13.07   | Sh01_g040220 | Dof-type zinc finger protein                                  |
|                                | SNP22840   | NS (P)                | 6 / 33828886             | 1.00E-06 | 10.59   | Sh06_g020100 | DNA mismatch repair protein MSH3                              |
|                                | SNP24679   | NS (P)                | 7 / 22355846             | 1.15E-08 | 15.29   | Sh07_g012680 | Conserved hypothetical protein                                |
|                                | SNP05953   | NS (R)                | 1 / 66130495             | 1.70E-12 | 24.02   | Sh01_g040220 | Dof-type zinc finger protein                                  |

| Trait                          | Marker     | Condition<br>(season) | Chromosome /<br>Position | P value  | PVE (%) | Gene         | Description                                   |
|--------------------------------|------------|-----------------------|--------------------------|----------|---------|--------------|-----------------------------------------------|
| <i>Drought inducible genes</i> |            |                       |                          |          |         |              |                                               |
| CD                             | SNP13091   | NS (R)                | 3 / 35520399             | 2.43E-08 | 14.38   | Sh03_g020240 | Reticulon-like protein                        |
|                                | SNP07895   | WS (R)                | 2 / 19935393             | 2.26E-09 | 16.41   | Sh02_g010540 | Similar to Apospory-associated protein C-like |
|                                | SNP15050   | WS (R)                | 4 / 1321819              | 2.22E-06 | 9.81    | Sh04_g000730 | Glutamate receptor                            |
|                                | SNP17340   | WS (R)                | 4 / 38804056             | 1.12E-07 | 11.74   | Sh04_g022680 | Salutaridine reductase                        |
|                                | SNP24679   | WS (R)                | 7 / 22355846             | 1.59E-06 | 10.60   | Sh07_g012680 | Conserved hypothetical protein                |
|                                | SNP33171   | WS (R)                | 10 / 29027260            | 4.87E-07 | 10.72   | Sh10_g015660 | Polyubiquitin 4                               |
| IL                             | SNP15240   | NS (R)                | 4 / 1972364              | 9.70E-07 | 10.85   | Sh04_g001400 | SKP1-like protein 11                          |
|                                | InDel03314 | NS (R)                | 10 / 21921494            | 9.00E-07 | 10.91   | Sh10_g011740 | Non-specific serine/threonine protein kinase  |
|                                | SNP19725   | WS (P)                | 6 / 1127030              | 1.72E-06 | 13.56   | Sh06_g000770 | Peptidyl-prolyl cis-trans isomerase Pin1      |
|                                | InDel03511 | WS (P)                | 10 / 31606658            | 1.63E-06 | 13.62   | Sh10_g017200 | Phosphatase DCR2                              |
| SCW                            | SNP13635   | WS (R)                | 3 / 41158322             | 3.24E-06 | 13.15   | Sh03_g024540 | NADH-cytochrome b5 reductase                  |
|                                | SNP13445   | NS (P)                | 3 / 38125702             | 1.38E-08 | 15.04   | Sh03_g022130 | Similar to Os01g0769000 protein               |
|                                | SNP28417   | NS (P)                | 9 / 18388955             | 6.24E-08 | 12.68   | Sh09_g009130 | Lichenase-2                                   |
|                                | SNP02866   | NS (R)                | 1 / 32991900             | 2.77E-08 | 14.93   | Sh01_g020090 | Cyclic dof factor 1                           |
|                                | SNP04329   | NS (R)                | 1 / 47872373             | 6.12E-08 | 13.37   | Sh01_g028210 | Similar to Expressed protein                  |
|                                | SNP05953   | NS (R)                | 1 / 66130495             | 3.38E-06 | 9.63    | Sh01_g040220 | Dof-type zinc finger protein                  |
|                                | SNP25508   | NS (R)                | 8 / 301065               | 7.76E-08 | 12.92   | Sh08_g000220 | E3 SUMO-protein ligase SIZ2                   |
|                                | SNP25644   | NS (R)                | 8 / 5768339              | 3.20E-07 | 12.27   | Sh08_g003660 | Tubby-like F-box protein                      |
|                                | SNP02285   | WS (P)                | 1 / 24019722             | 3.25E-06 | 12.84   | Sh01_g015370 | Serine incorporator 3                         |
|                                | SNP05953   | NS (P)                | 1 / 66130495             | 3.21E-07 | 10.86   | Sh01_g040220 | Dof-type zinc finger protein                  |
| NMC                            | SNP23501   | NS (P)                | 7 / 8089083              | 4.59E-07 | 12.18   | Sh07_g005700 | Aconitate hydratase                           |
|                                | SNP28844   | NS (P)                | 9 / 24884959             | 9.20E-07 | 9.85    | Sh09_g012650 | Protein phosphatase 2C 3                      |
|                                | SNP32524   | NS (P)                | 10 / 22470080            | 1.48E-06 | 9.73    | Sh10_g011920 | Diacylglycerol O-acyltransferase 1-2          |
|                                | SNP34157   | NS (P)                | 10 / 34290570            | 3.80E-08 | 13.65   | Sh10_g019050 | Phytoene synthase, chloroplastic              |
|                                | SNP12358   | NS (R)                | 3 / 22267073             | 8.89E-07 | 9.54    | Sh03_g012720 | 70 kDa peptidyl-prolyl isomerase              |
|                                | SNP16114   | NS (R)                | 4 / 18806196             | 2.38E-06 | 9.39    | Sh04_g010560 | Acetolactate synthase 1, chloroplastic        |
|                                | SNP24461   | NS (R)                | 7 / 20853629             | 1.11E-06 | 11.26   | Sh07_g011750 | Similar to Putative SEC23                     |
|                                | InDel03500 | NS (R)                | 10 / 31253769            | 1.02E-08 | 16.13   | Sh10_g016930 | Xyloglucan endotransglucosylase/hydrolase     |
|                                | SNP08052   | NS (P)                | 2 / 26576643             | 1.49E-08 | 14.96   | Sh02_g013850 | Similar to Os09g0439000 protein               |
|                                | SNP27968   | NS (P)                | 9 / 9561800              | 3.37E-09 | 16.33   | Sh09_g005710 | 60S ribosomal protein L13                     |
| SY                             | SNP07858   | NS (R)                | 2 / 19603616             | 2.21E-10 | 19.65   | Sh02_g010430 | Plant cysteine oxidase 5                      |
|                                | SNP25403   | NS (R)                | 8 / 297131               | 1.41E-06 | 10.65   | Sh08_g000220 | E3 SUMO-protein ligase SIZ2                   |
|                                | SNP32155   | NS (R)                | 10 / 20160298            | 8.03E-09 | 15.03   | Sh10_g011140 | Conserved hypothetical protein                |

| Trait                          | Marker     | Condition<br>(season) | Chromosome /<br>Position | P value  | PVE (%) | Gene         | Description                                                        |
|--------------------------------|------------|-----------------------|--------------------------|----------|---------|--------------|--------------------------------------------------------------------|
| <i>Drought inducible genes</i> |            |                       |                          |          |         |              |                                                                    |
| SY                             | InDel01261 | WS (P)                | 3 / 10040814             | 2.75E-08 | 14.93   | Sh03_g005970 | E3 ubiquitin-protein ligase                                        |
|                                | SNP28936   | WS (P)                | 9 / 25705204             | 2.20E-06 | 9.35    | Sh09_g013110 | Putative protein                                                   |
| CCS                            | SNP18684   | NS (P)                | 5 / 5126869              | 6.44E-07 | 10.94   | Sh05_g003160 | Long chain acyl-CoA synthetase 8                                   |
|                                | SNP21819   | NS (P)                | 6 / 22119189             | 3.94E-06 | 9.72    | Sh06_g012220 | Putative similar to Expressed protein                              |
|                                | SNP25403   | NS (P)                | 8 / 297131               | 1.15E-06 | 10.73   | Sh08_g000220 | E3 SUMO-protein ligase SIZ2                                        |
|                                | SNP30775   | NS (P)                | 10 / 8356963             | 2.69E-06 | 10.80   | Sh10_g005390 | Cystathionine gamma-synthase                                       |
|                                | SNP21122   | NS (R)                | 6 / 14419780             | 3.45E-08 | 13.79   | Sh06_g007680 | Putative ADP-ribosylation factor 1                                 |
|                                | SNP08601   | WS (P)                | 2 / 30539439             | 2.63E-06 | 10.08   | Sh02_g016000 | F-box domain containing protein                                    |
|                                | SNP27250   | WS (P)                | 9 / 4917629              | 3.16E-06 | 8.44    | Sh09_g003050 | S-adenosylmethionine synthase 1                                    |
|                                | SNP28553   | WS (P)                | 9 / 20200509             | 1.53E-06 | 10.72   | Sh09_g009960 | DUF21 domain-containing protein                                    |
|                                | SNP13888   | WS (R)                | 3 / 44183889             | 2.13E-08 | 14.50   | Sh03_g026400 | Similar to Os01g0849500 protein                                    |
| BR                             | SNP17282   | NS (P)                | 4 / 38773420             | 4.34E-07 | 11.88   | Sh04_g022670 | Salutaridine reductase                                             |
|                                | SNP25403   | NS (P)                | 8 / 297131               | 1.55E-06 | 10.58   | Sh08_g000220 | E3 SUMO-protein ligase SIZ2                                        |
|                                | SNP29415   | NS (P)                | 9 / 30947902             | 1.53E-06 | 10.27   | Sh09_g016850 | Beta-galactosidase 8                                               |
|                                | SNP08601   | NS (R)                | 2 / 30539439             | 2.13E-08 | 14.42   | Sh02_g016000 | F-box domain containing protein                                    |
|                                | SNP11963   | NS (R)                | 3 / 14056404             | 4.31E-07 | 11.37   | Sh03_g008520 | RNA binding protein                                                |
|                                | SNP22843   | NS (R)                | 6 / 33828914             | 2.84E-06 | 10.24   | Sh06_g020100 | DNA mismatch repair protein MSH3                                   |
|                                | InDel00869 | WS (P)                | 2 / 28754538             | 1.89E-08 | 12.85   | Sh02_g015090 | Similar to Os02g0781700 protein                                    |
|                                | SNP12411   | WS (P)                | 3 / 22271193             | 6.26E-09 | 13.98   | Sh03_g012720 | 70 kDa peptidyl-prolyl isomerase                                   |
|                                | SNP16838   | WS (P)                | 4 / 34252556             | 3.66E-06 | 8.20    | Sh04_g020080 | Myb-related protein Zm1                                            |
|                                | SNP22843   | WS (P)                | 6 / 33828914             | 8.18E-09 | 15.53   | Sh06_g020100 | DNA mismatch repair protein MSH3                                   |
|                                | SNP31664   | WS (P)                | 10 / 16011797            | 3.22E-06 | 9.09    | Sh10_g009590 | Jumonji transcription factor                                       |
|                                | SNP04603   | WS (R)                | 1 / 49414358             | 2.80E-06 | 13.26   | Sh01_g029210 | Similar to Importin subunit alpha-2                                |
| PO                             | SNP08596   | NS (P)                | 2 / 30539289             | 4.09E-08 | 12.00   | Sh02_g016000 | F-box domain containing protein                                    |
|                                | SNP08829   | NS (P)                | 2 / 31960537             | 1.17E-07 | 13.16   | Sh02_g017140 | Ubiquitinyl hydrolase 1                                            |
|                                | SNP10174   | NS (P)                | 2 / 45553777             | 6.09E-07 | 10.67   | Sh02_g026710 | Conserved hypothetical protein                                     |
|                                | SNP27268   | NS (P)                | 9 / 4917949              | 1.80E-10 | 17.76   | Sh09_g003050 | S-adenosylmethionine synthase 1                                    |
|                                | SNP17462   | WS (P)                | 4 / 39449984             | 7.36E-08 | 12.93   | Sh04_g023190 | Ferredoxin--nitrite reductase, chloroplastic                       |
|                                | InDel02088 | WS (P)                | 6 / 1309716              | 1.26E-06 | 10.44   | Sh06_g000950 | Pyruvate dehydrogenase E1 component subunit alpha-3, chloroplastic |
|                                | SNP13100   | WS (R)                | 3 / 35520862             | 8.90E-07 | 10.03   | Sh03_g020240 | Reticulon-like protein                                             |
|                                | SNP14699   | WS (R)                | 3 / 53402844             | 2.55E-06 | 10.51   | Sh03_g032790 | Similar to Putative beta-galactosidase                             |
|                                | SNP31150   | WS (R)                | 10 / 12672682            | 5.29E-07 | 11.66   | Sh10_g007850 | Protein exordium                                                   |

| Trait                          | Marker     | Condition<br>(season) | Chromosome /<br>Position | P value  | PVE (%) | Gene         | Description                                                                   |
|--------------------------------|------------|-----------------------|--------------------------|----------|---------|--------------|-------------------------------------------------------------------------------|
| <i>Drought inducible genes</i> |            |                       |                          |          |         |              |                                                                               |
| PU                             | SNP15639   | NS (P)                | 4 / 5794101              | 1.16E-08 | 15.22   | Sh04_g003900 | Phosphoglycerate kinase, cytosolic                                            |
|                                | SNP10544   | NS (R)                | 2 / 52479176             | 4.41E-10 | 17.82   | Sh02_g031600 | 26S protease regulatory subunit 4 homolog                                     |
|                                | SNP13643   | NS (R)                | 3 / 41158911             | 5.76E-09 | 14.63   | Sh03_g024540 | NADH-cytochrome b5 reductase                                                  |
|                                | SNP29239   | NS (R)                | 9 / 28581507             | 1.64E-07 | 11.89   | Sh09_g015130 | Similar to Chromosome chr14 scaffold_21                                       |
|                                | SNP24014   | WS (P)                | 7 / 16722012             | 7.01E-09 | 14.86   | Sh07_g009680 | Similar to FYVE finger-containing phosphoinositide kinase-like                |
|                                | SNP24669   | WS (P)                | 7 / 22355558             | 7.45E-07 | 11.34   | Sh07_g012680 | Conserved hypothetical protein                                                |
|                                | SNP26435   | WS (P)                | 8 / 23612728             | 1.68E-06 | 10.57   | Sh08_g012730 | Conserved hypothetical protein                                                |
| FB                             | SNP01128   | NS (P)                | 1 / 10267445             | 4.13E-06 | 7.93    | Sh01_g007080 | ATP sulfurylase                                                               |
|                                | SNP16094   | NS (P)                | 4 / 18805244             | 1.73E-08 | 14.85   | Sh04_g010560 | Acetolactate synthase 1, chloroplastic                                        |
|                                | SNP04871   | NS (R)                | 1 / 52787966             | 1.60E-06 | 13.60   | Sh01_g031440 | Phytochrome B                                                                 |
|                                | SNP22770   | WS (P)                | 6 / 32768250             | 1.89E-08 | 15.04   | Sh06_g019340 | Anamorsin homolog                                                             |
|                                | SNP29592   | WS (P)                | 9 / 33106253             | 1.01E-07 | 11.91   | Sh09_g018430 | Chlorophyll a-b binding protein M9, chloroplastic                             |
|                                | InDel03129 | WS (P)                | 10 / 6354878             | 2.89E-06 | 10.29   | Sh10_g004040 | Putative 5-methyltetrahydropteroyltriglutamate-homocysteine methyltransferase |
| DC <sub>IL</sub>               | InDel03511 | Index (P)             | 10 / 31606658            | 5.91E-07 | 11.54   | Sh10_g017200 | Phosphatase DCR2                                                              |
| DC <sub>SCW</sub>              | SNP05965   | Index (P)             | 1 / 66130846             | 2.02E-15 | 30.52   | Sh01_g040220 | Dof-type zinc finger protein                                                  |
|                                | SNP08083   | Index (R)             | 2 / 26578367             | 7.93E-07 | 11.23   | Sh02_g013850 | Similar to Os09g0439000 protein                                               |
|                                | SNP15105   | Index (R)             | 4 / 1325019              | 3.85E-07 | 12.23   | Sh04_g000730 | Glutamate receptor                                                            |
|                                | SNP20588   | Index (R)             | 6 / 11281177             | 7.18E-12 | 23.19   | Sh06_g005230 | Similar to OSJNBa0058G03.7 protein                                            |
| DC <sub>CY</sub>               | SNP25508   | Index (R)             | 8 / 301065               | 6.95E-07 | 10.95   | Sh08_g000220 | E3 SUMO-protein ligase SIZ2                                                   |
|                                | InDel03254 | Index (R)             | 10 / 16015694            | 1.94E-06 | 10.74   | Sh10_g009590 | Jumonji transcription factor                                                  |
| DC <sub>SY</sub>               | SNP10998   | Index (P)             | 3 / 3782911              | 3.77E-07 | 12.21   | Sh03_g002230 | Similar to Expressed protein                                                  |
|                                | SNP27968   | Index (P)             | 9 / 9561800              | 1.14E-12 | 24.96   | Sh09_g005710 | 60S ribosomal protein L13                                                     |
|                                | SNP00390   | Index (R)             | 1 / 3460814              | 2.61E-06 | 9.58    | Sh01_g002510 | Conserved hypothetical protein                                                |
|                                | SNP03302   | Index (R)             | 1 / 41296454             | 1.02E-07 | 13.50   | Sh01_g023980 | Peroxidase                                                                    |
|                                | SNP07644   | Index (R)             | 2 / 16207065             | 1.38E-06 | 10.57   | Sh02_g009160 | Beta-amylase                                                                  |
|                                | InDel01155 | Index (R)             | 3 / 3785054              | 2.23E-06 | 9.46    | Sh03_g002230 | Similar to Expressed protein                                                  |
| MFVD                           | SNP16114   | Index (R)             | 4 / 18806196             | 6.76E-11 | 21.54   | Sh04_g010560 | Acetolactate synthase 1, chloroplastic                                        |
|                                | SNP25057   | Index (P)             | 7 / 26076236             | 5.75E-07 | 10.37   | Sh07_g015500 | Putative protein                                                              |
|                                | SNP28494   | Index (P)             | 9 / 19319254             | 5.76E-07 | 10.36   | Sh09_g009570 | Ribosomal protein                                                             |
|                                | SNP03302   | Index (R)             | 1 / 41296454             | 4.13E-07 | 11.86   | Sh01_g023980 | Peroxidase                                                                    |
